# Supplementary material
Source: PubMed Central journal article supplement (PMC5192887)
Supplement: BPH-174-150-s001.pdf [file BPH-174-150-s001.pdf]

## **Supplementary Information to the article:**

### **Do Kv7.1 channels contribute to control of arterial vascular tone?**

Dmitry Tsvetkov,<sup>1\*</sup> Mario Kaßmann,<sup>1\*</sup> Jean-Yves Tano,<sup>1</sup> Lan Chen,<sup>1,2</sup> Johanna Schleifenbaum,<sup>1</sup>

Jakob Voelkl,<sup>3</sup> Florian Lang,<sup>3</sup> Yu Huang,<sup>4</sup> and Maik Gollasch<sup>1, 5</sup>

1. Experimental and Clinical Research Center (ECRC), a joint cooperation between the Charité Medical Faculty and the Max Delbrück Center for Molecular Medicine (MDC), Lindenberger Weg 80, 13125 Berlin, Germany, \* equal contribution
2. Xiamen Zhongshan Hospital, Xiamen University, Xiamen, Fujian Province, China
3. Department of Physiology I, University of Tübingen, Gmelinstraße 5, 72076 Tübingen
4. School of Biomedical Sciences, 223A, Lo Kwee-Seong Integrated Biomedical Sciences Building, Area 39, Chinese University of Hong Kong
5. Medical Clinic for Nephrology and Internal Intensive Care, Campus Virchow, Charité University Medicine, 13353 Berlin, Germany

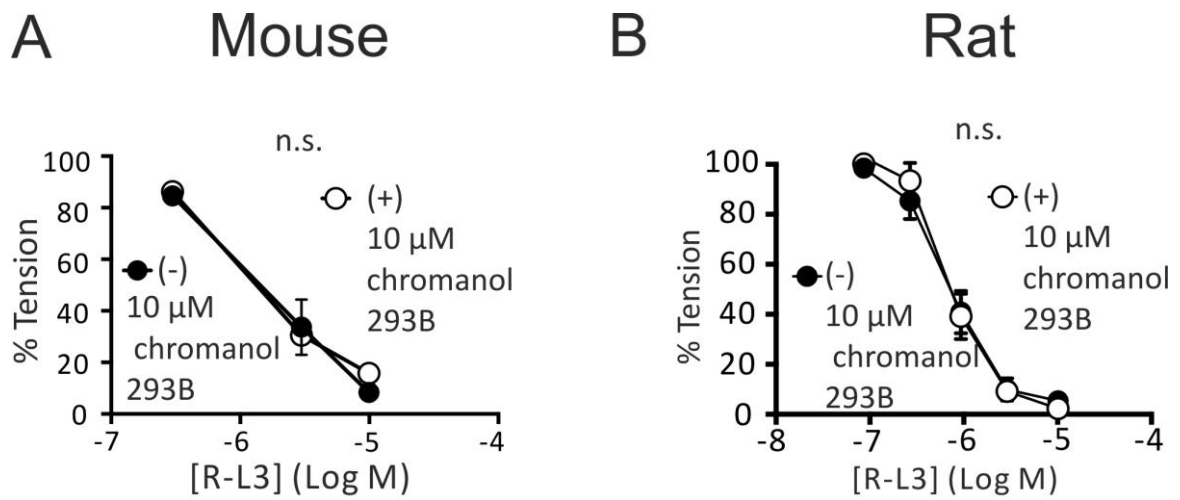

**Figure S1**

**Figure S1:** Pretreatment of (-) fat murine (panel A) and (-) fat rat (panel B) mesenteric arteries with 10  $\mu$ M chromanol 293B [(+) chromanol 293B] and subsequent exposure to R-L3. (-) Chromanol 293B; control, non-treated vessels. n.s.,  $P \geq 0.05$ . n=5 per group.

Mouse Renal  
(-) fat *Kcnq1*<sup>+/+</sup>

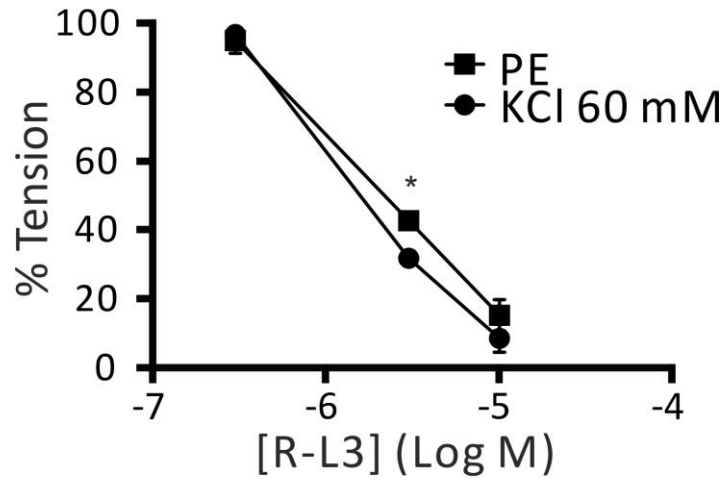

Figure S2

**Figure S2:** Relaxation of (-) fat murine renal artery rings by R-L3. Vessels were isolated from wild-type (*Kcnq1* <sup>+/+</sup>) mice. Arteries were precontracted by 1  $\mu$ M phenylephrine (PE) or KCl 60 mM. Tension is expressed as a percentage of KCl or PE induced contractions. \*,  $P < 0.05$ . n=5 per group.

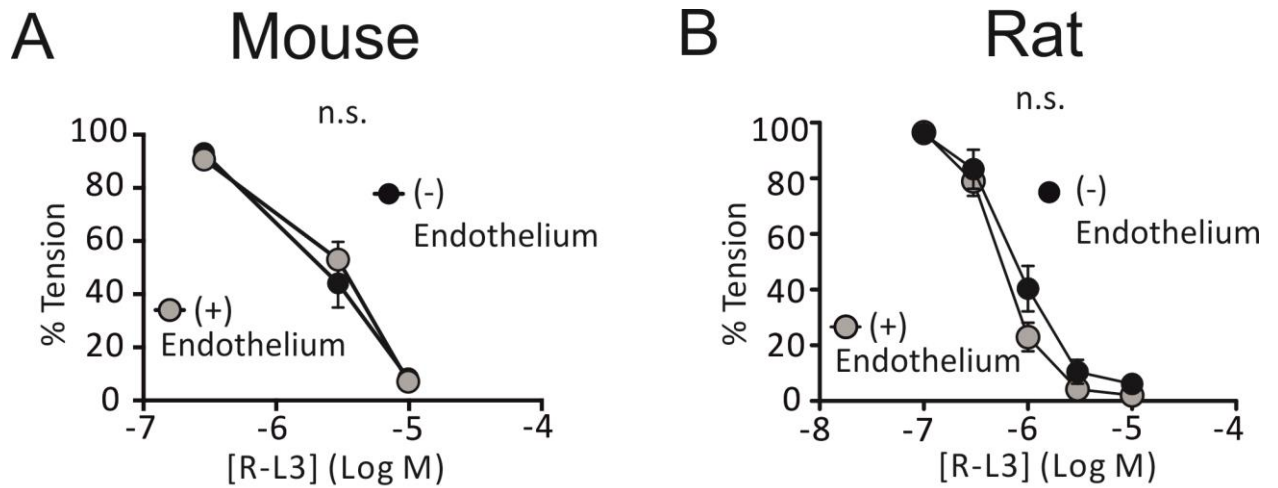

**Figure S3**

**Figure S3:** Relaxation of endothelium-denuded murine (panel A) and rat (panel B) mesenteric artery rings by R-L3. (-) Endothelium: (-) fat, endothelium-denuded vessels; (+) Endothelium: (-) fat, endothelium-intact vessels. Arteries were precontracted by 1  $\mu$ M phenylephrine (PE). Murine mesenteric arteries were isolated from *Kcnq1*<sup>+/+</sup> mice. Tension is expressed as a percentage of PE induced contractions. n.s.,  $P \geq 0.05$ . n=5 per group.

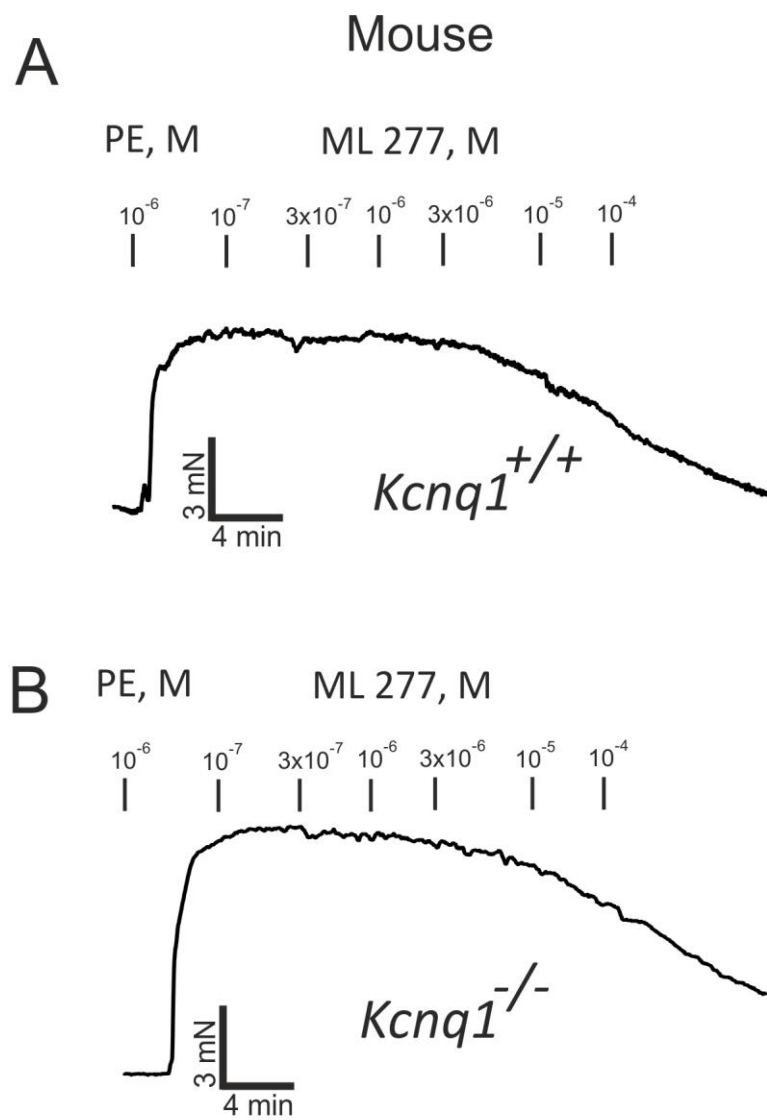

Figure S4

**Figure S4:** Original traces showing relaxation induced by  $K_v7.1$  opener ML277 in (-) fat murine mesenteric artery rings isolated from *Kcnq1<sup>+/+</sup>* (**panel A**) and *Kcnq1<sup>-/-</sup>* mice (**panel B**) precontracted with 1  $\mu$ M phenylephrine.

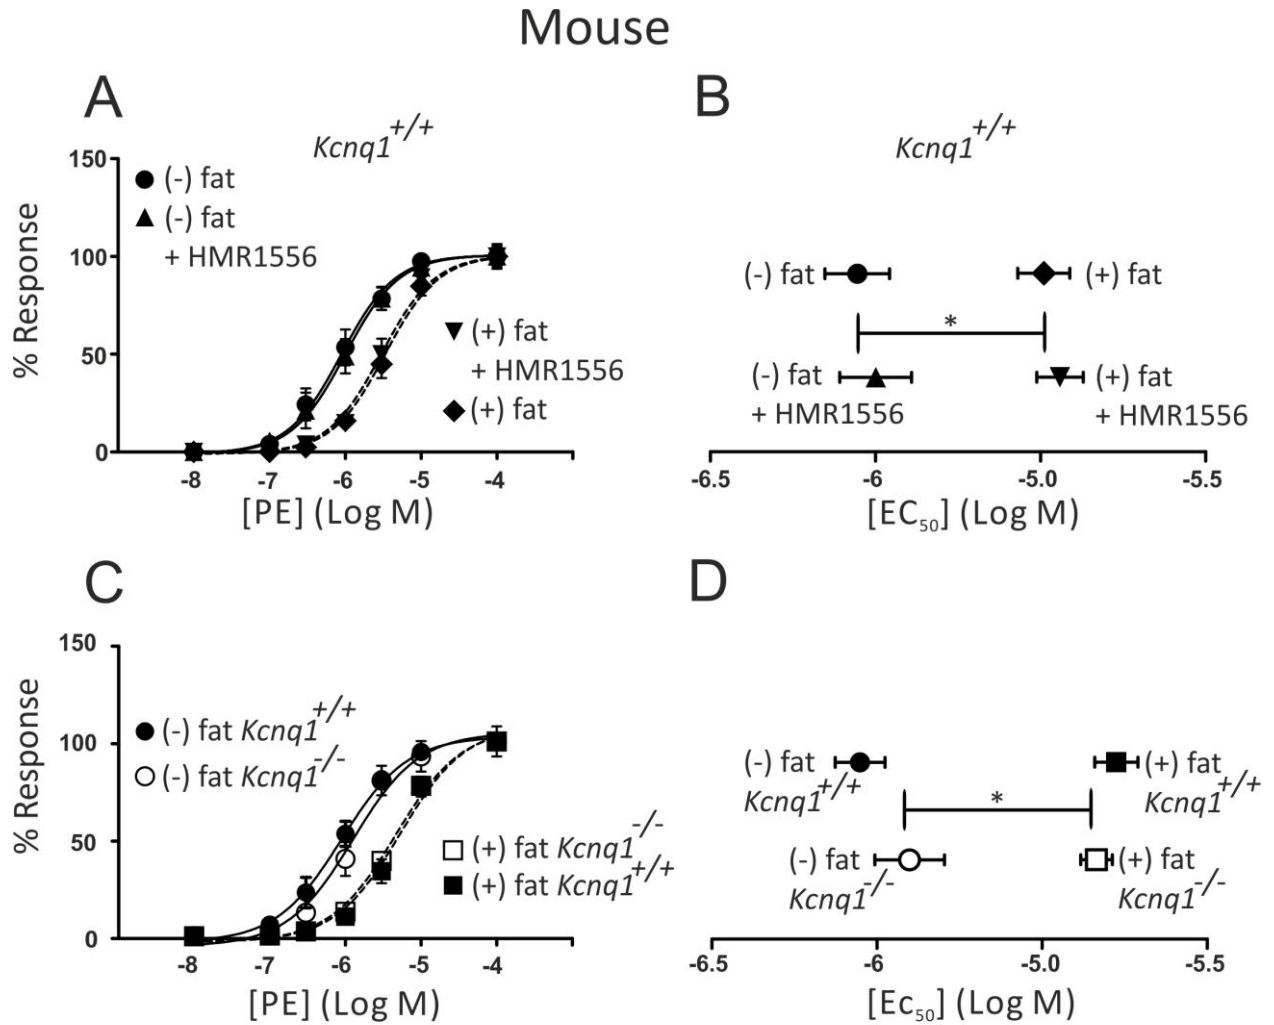

Figure S5

**Figure S5:** Dose response curves and EC<sub>50</sub> values for phenylephrine (PE)-induced contractions of (-) fat and (+) fat murine mesenteric artery rings isolated from *Kcnq1*<sup>+/+</sup> and *Kcnq1*<sup>-/-</sup> mice. Nonlinear regression model of dose-response curves to PE in the presence or absence of HMR1556 with or without fat (n=5 per group) (**panel A**) and their corresponding EC<sub>50</sub> values (**panel B**). Nonlinear regression model of dose-response curves to PE in *Kcnq1*<sup>+/+</sup> ((+) fat; (-) fat, n=7 per group) and *Kcnq1*<sup>-/-</sup> arteries ((+) fat; (-) fat, n=7 per group) (**panel C**) and their corresponding EC<sub>50</sub> values (**panel D**). \*, *P* < 0.05.

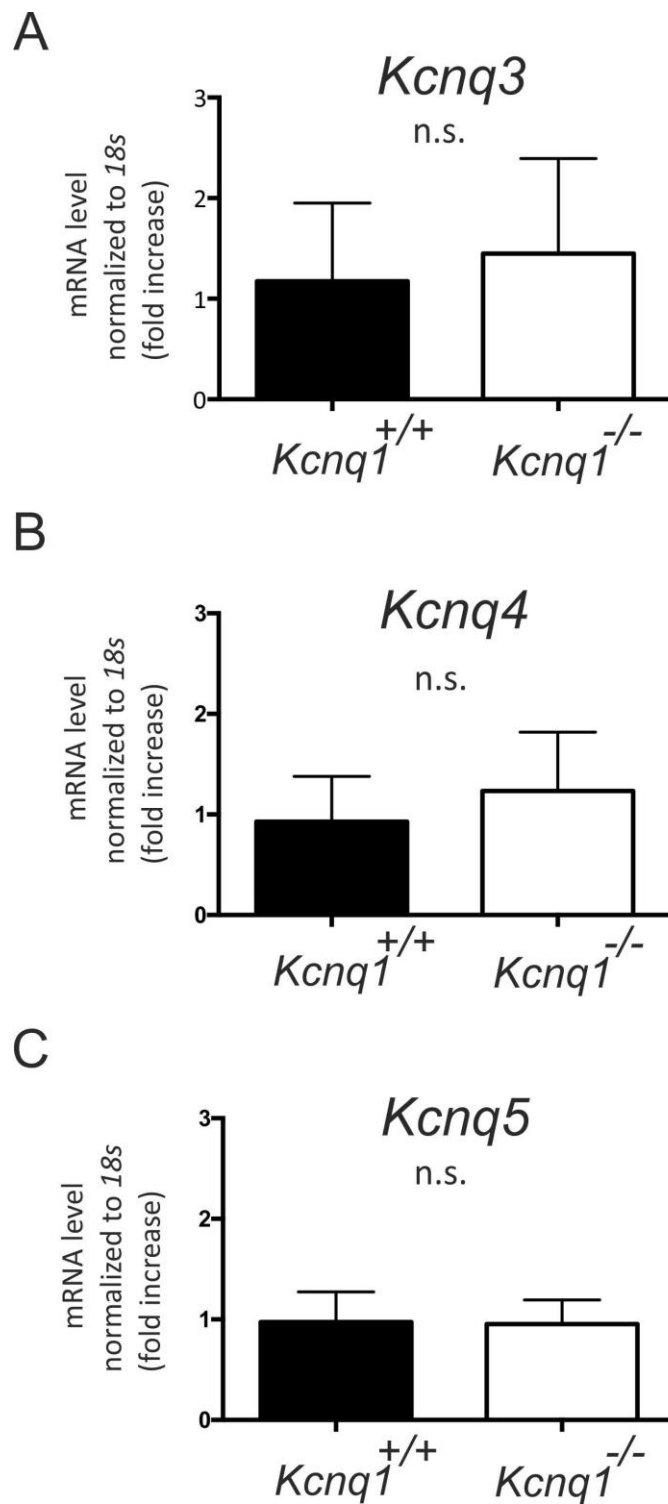

Figure S6

**Figure S6:** Relative expression of Kcnq3-5 channels at RNA levels in (-) fat mesenteric arteries from *Kcnq1*<sup>+/+</sup> and *Kcnq1*<sup>-/-</sup> mice normalized to 18s. Relative mRNA levels for *Kcnq3* (panel A) (n=6 for *Kcnq1*<sup>+/+</sup>; n=5 for *Kcnq1*<sup>-/-</sup>), *Kcnq4* (panel B) (n=6 for *Kcnq1*<sup>+/+</sup>; n=6 for *Kcnq1*<sup>-/-</sup>) and *Kcnq5* expression (panel C) (n=5 for *Kcnq1*<sup>+/+</sup>; n=5 for *Kcnq1*<sup>-/-</sup>). n.s.,  $P \geq 0.05$ , unpaired t-test.

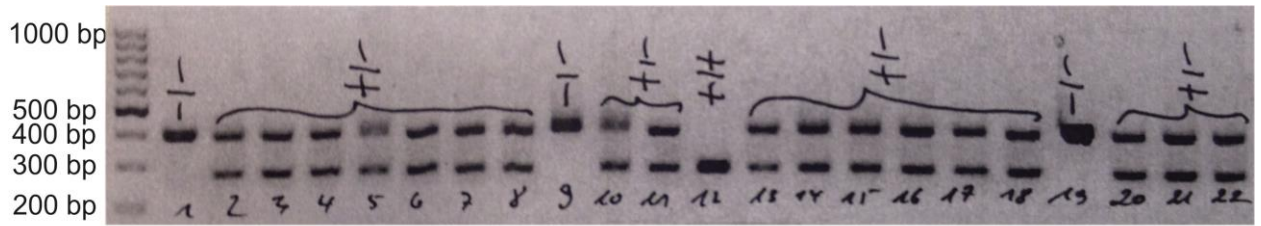

Figure S7

**Figure S7.** PCR genotyping of *Kcnq1*<sup>+/+</sup> and *Kcnq1*<sup>-/-</sup> mice. Amplification by using the forward and reverse primers gives a 240-bp product specific to the wild-type (+/+) allele. Amplification by using the Neo forward and reverse primers gives a 370-bp product specific to the null allele (-/-) (Casimiro et al., 2001).

**Video S8.** Demonstration of shaker-waltzer phenotype (hyperactivity, head shaking, and/or circling), due to abnormality of the vestibular apparatus in *Kcnq1*<sup>-/-</sup> mice. The video shows the typical behavior of lack of Kv7.1 function in the mouse.

Reference:

Casimiro, M.C., Knollmann, B.C., Ebert, S.N., Vary, J.C., Greene, A.E., Franz, M.R., et al. (2001). Targeted disruption of the *Kcnq1* gene produces a mouse model of Jervell and Lange-Nielsen Syndrome. *Proc. Natl. Acad. Sci. U. S. A.* 98: 2526–31.
